# Supplementary material for: High stability and superior catalytic reactivity of nitrogen-doped graphene supporting Pt nanoparticles as a catalyst for the oxygen reduction reaction: a density functional theory study
Source: Royal Society of Chemistry journal article supplement (doi:10.1039/c5ra02585k), 2015-01-01
Supplement: c5ra02585k1.pdf [file c5ra02585k1.pdf]

**Table S1:** Comparison of the binding energies ( $E_b$ ) for  $\text{Pt}_{13}$  cluster on N-doped graphene with 3NV structure on (a) different supercell or (b) with different k-points.

| (a)            |        |
|----------------|--------|
| supercell size | $E_b$  |
| $5 \times 5$   | -6.495 |
| $6 \times 6$   | -6.492 |
| $7 \times 7$   | -6.491 |

  

| (b)                   |        |
|-----------------------|--------|
| k-point density       | $E_b$  |
| $2 \times 2 \times 1$ | -6.495 |
| $3 \times 3 \times 1$ | -6.495 |
| $4 \times 4 \times 1$ | -6.496 |
| $5 \times 5 \times 1$ | -6.496 |
| $6 \times 6 \times 1$ | -6.496 |
| $7 \times 7 \times 1$ | -6.496 |

**Table S2:** Adsorption energies and structural parameters of O on deposited Pt<sub>13</sub> clusters on N-doped graphene with (a) N<sub>C</sub>, (b) 3NV, and (c) 4ND structures.

| site         | $E_{\text{ads}}$ | $d_{\text{Pt-O}}$ |
|--------------|------------------|-------------------|
| Pt1          | -0.914           | 1.822             |
| Pt1-Pt2      | -1.458           | 1.939             |
| Pt1-Pt12     | -1.473           | 1.918             |
| Pt1-Pt5      | -1.028           | 1.954             |
| Pt1-Pt5-Pt8  | -1.196           | 2.034             |
| Pt1-Pt8      | -1.121           | 1.952             |
| Pt1-Pt12     | -1.494           | 1.919             |
| Pt2          | -1.320           | 1.785             |
| Pt2-Pt3      | -1.123           | 1.988             |
| Pt2-Pt6-Pt13 | -0.890           | 2.019             |
| Pt2-Pt7      | -1.196           | 1.917             |
| Pt2-Pt6      | -1.143           | 1.953             |
| Pt3          | -1.383           | 1.919             |
| Pt3-Pt4-Pt10 | -1.052           | 2.022             |
| Pt3-Pt4-Pt12 | -1.088           | 1.969             |
| Pt3-Pt6      | -1.721           | 1.987             |
| Pt3-Pt10     | -1.285           | 1.934             |
| Pt3-Pt12     | -1.410           | 1.921             |
| Pt4-Pt5      | -1.101           | 1.917             |
| Pt4-Pt5-Pt9  | -1.130           | 1.988             |
| Pt4-Pt9-Pt10 | -1.141           | 2.088             |
| Pt4-Pt10     | -1.410           | 1.973             |
| Pt4-Pt12     | -1.060           | 1.908             |
| Pt5          | -1.310           | 1.797             |
| Pt5-Pt8      | -1.385           | 1.592             |
| Pt5-Pt9      | -1.174           | 1.898             |
| Pt6          | -1.180           | 1.800             |
| Pt6-Pt13     | -1.762           | 1.964             |
| Pt7          | -1.114           | 1.783             |
| Pt7-Pt8      | -1.512           | 1.920             |
| Pt7-Pt13     | -1.254           | 1.907             |
| Pt8          | -0.656           | 1.822             |
| Pt11-Pt13    | -0.523           | 1.922             |
| Pt12         | -1.370           | 1.782             |

(b)

| site         | $E_{\text{ads}}$ | $d_{\text{Pt-O}}$ |
|--------------|------------------|-------------------|
| Pt1          | -0.492           | 1.801             |
| Pt1-Pt2      | -1.508           | 1.956             |
| Pt1-Pt5-Pt8  | -1.310           | 2.052             |
| Pt1-Pt7      | -0.772           | 1.988             |
| Pt1-Pt8      | -1.452           | 1.967             |
| Pt1-Pt12     | -0.531           | 1.911             |
| Pt2          | -0.634           | 1.801             |
| Pt2-Pt3      | -1.110           | 1.967             |
| Pt2-Pt12     | -0.298           | 1.945             |
| Pt3-Pt4      | -0.466           | 1.909             |
| Pt3-Pt6      | -0.844           | 1.954             |
| Pt3-Pt12     | -1.070           | 1.940             |
| Pt4          | -0.545           | 1.788             |
| Pt4-Pt5      | -0.871           | 1.965             |
| Pt4-Pt10     | -0.792           | 1.955             |
| Pt4-Pt12     | -1.170           | 1.959             |
| Pt5          | -0.564           | 1.788             |
| Pt5-Pt8      | -1.138           | 1.915             |
| Pt5-Pt9      | -0.742           | 1.953             |
| Pt5-Pt9-Pt10 | -0.330           | 1.966             |
| Pt5-Pt12     | -1.186           | 1.932             |
| Pt6          | -0.922           | 1.797             |
| Pt6-Pt10     | -1.653           | 1.973             |
| Pt8          | -0.439           | 1.811             |
| Pt8-Pt9      | -1.210           | 1.968             |
| Pt8-Pt13     | -1.723           | 1.957             |
| Pt9          | -0.596           | 1.788             |
| Pt9-Pt10     | -1.365           | 1.954             |
| Pt9-Pt13     | -0.817           | 1.924             |
| Pt10         | -0.477           | 1.805             |
| Pt10-Pt13    | -0.808           | 2.017             |
| Pt12         | -0.800           | 1.788             |

(c)

| site         | $E_{\text{ads}}$ | $d_{\text{Pt-O}}$ |
|--------------|------------------|-------------------|
| Pt1-Pt2      | -0.371           | 1.967             |
| Pt1-Pt2-Pt6  | -0.695           | 1.988             |
| Pt1-Pt2-Pt12 | -0.486           | 2.071             |
| Pt1-Pt5      | -1.256           | 1.965             |
| Pt1-Pt5-Pt8  | -0.172           | 2.011             |
| Pt1-Pt5-Pt12 | -0.481           | 2.017             |
| Pt1-Pt6      | -0.543           | 1.930             |
| Pt1-Pt7      | -0.794           | 1.933             |
| Pt1-Pt7-Pt8  | -0.662           | 2.014             |
| Pt1-Pt2-Pt12 | -0.618           | 2.056             |
| Pt2          | -0.997           | 1.786             |
| Pt2-Pt3      | -1.038           | 1.954             |
| Pt2-Pt3-Pt6  | -0.691           | 1.974             |
| Pt2-Pt3-Pt12 | -0.732           | 2.056             |
| Pt2-Pt6      | -1.284           | 1.974             |
| Pt2-Pt12     | -1.394           | 1.957             |
| Pt3-Pt4      | -1.079           | 1.940             |
| Pt3-Pt4-Pt10 | -0.532           | 2.005             |
| Pt3-Pt4-Pt12 | -0.415           | 2.002             |
| Pt3-Pt6      | -0.741           | 1.937             |
| Pt3-Pt12     | -0.769           | 1.953             |
| Pt4          | -0.649           | 1.794             |
| Pt4-Pt9      | -1.169           | 1.954             |
| Pt4-Pt9-Pt12 | -0.913           | 2.082             |
| Pt4-Pt10     | -0.825           | 1.936             |
| Pt4-Pt12     | -0.702           | 1.972             |
| Pt5          | -1.195           | 1.783             |
| Pt5-Pt8      | -1.200           | 1.975             |
| Pt5-Pt8-Pt9  | -0.660           | 1.992             |
| Pt5-Pt9      | -1.507           | 1.973             |
| Pt5-Pt12     | -0.928           | 1.957             |
| Pt6          | -1.286           | 1.976             |
| Pt6-Pt7      | -1.115           | 1.951             |
| Pt7          | -0.156           | 1.799             |
| Pt8          | -0.800           | 1.809             |
| Pt9          | -1.091           | 1.780             |
| Pt9-Pt12     | -0.706           | 1.945             |
| Pt12         | -0.517           | 1.796             |

**Figure S1.** The most stable configurations and binding energies of Pt<sub>13</sub> clusters with C<sub>4v</sub>, D<sub>5h</sub>, O<sub>h</sub>, and I<sub>h</sub> symmetry structures and the low energy structure on N-doped graphene with the 3NV structure.

**Figure S2.** The PDOS of (a) free Pt<sub>13</sub> and the Pt atoms far away from interface in the supported Pt<sub>13</sub> clusters on (b) N<sub>C</sub>, (c) 3NV, and (d) 4ND. The Fermi level is set as zero

Figure S1

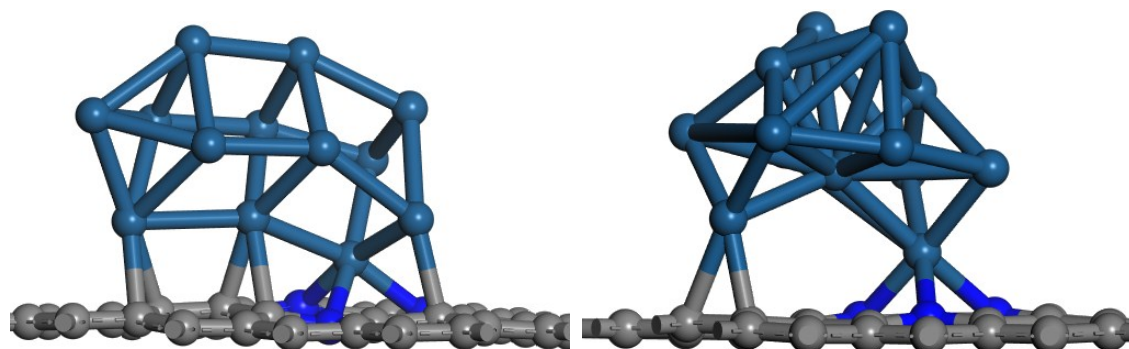

(a)  $E_b = -4.200$  eV

(b)  $E_b = -5.856$  eV

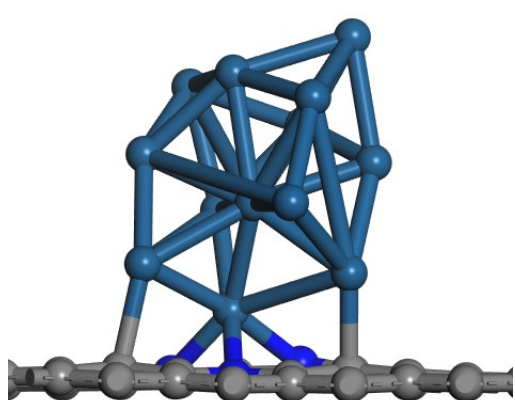

(c)  $E_b = -4.919$  eV

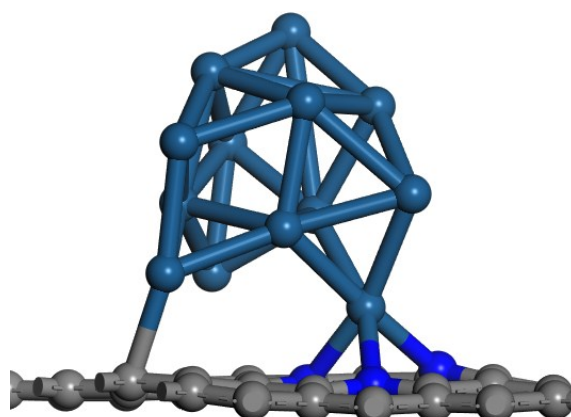

(d)  $E_b = -5.328$  eV

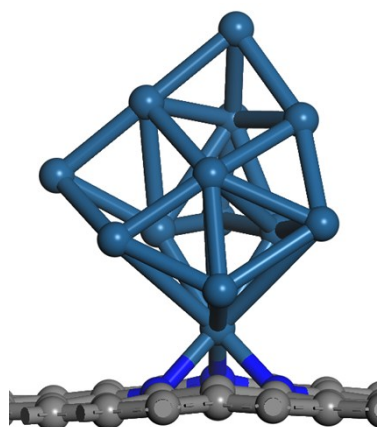

(e)  $E_b = -6.848$  eV

Figure S2

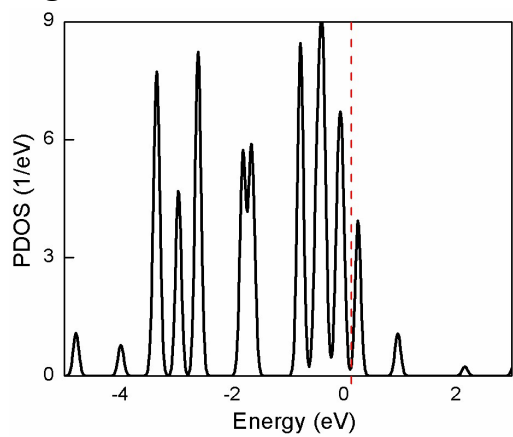

(a)

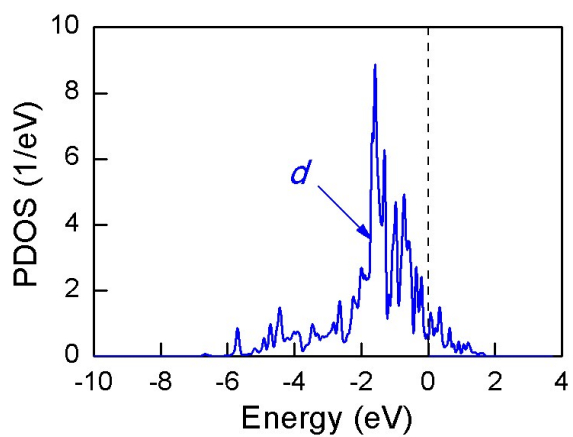

(b)

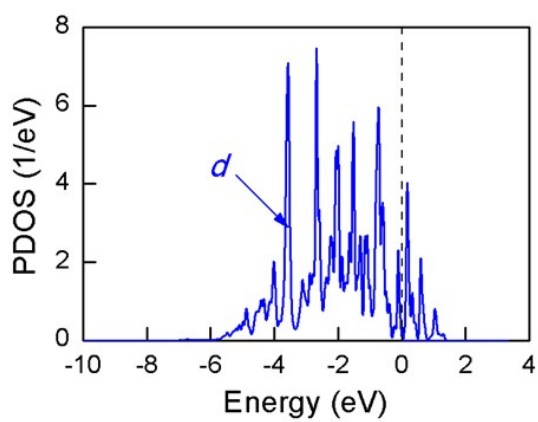

(c)

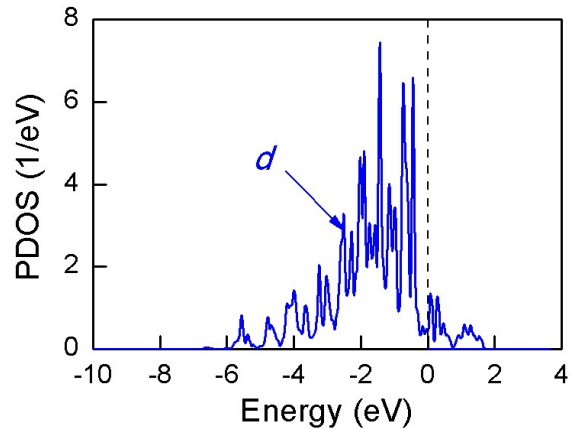

(d)
